# Supplementary material
Source: PubMed Central journal article supplement (PMC4854698)
Supplement: supp_pp.15.01990_PP2015-01990R1_Supplemental_Materialfig1.pdf [file supp_pp.15.01990_PP2015-01990R1_Supplemental_Materialfig1.pdf]

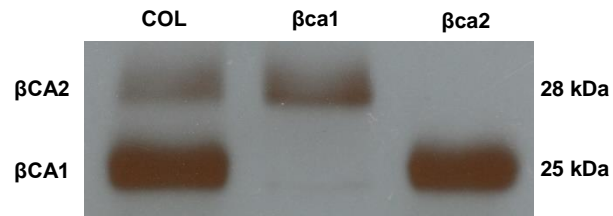

**Supplemental Fig. 1. A Western blot confirming the CA antibody cross-reacts with both  $\beta CA1$  and  $\beta CA2$ .** The  $\beta ca1$  T-DNA mutant (SALK\_106570) lacks the protein band at 25 kDa, confirming the band as the  $\beta CA1$  protein. The  $\beta ca2$  T-DNA mutant lacks the protein band at 28 kDa as previously shown. Each lane contains a  $5 \mu\text{g } \mu\text{L}^{-1}$  total protein load from a leaf source.
