# Supplementary material
Source: PubMed Central journal article supplement (PMC4854698)
Supplement: supp_pp.15.01990_PP2015-01990R1_Supplemental_Materialfig2.pdf [file supp_pp.15.01990_PP2015-01990R1_Supplemental_Materialfig2.pdf]

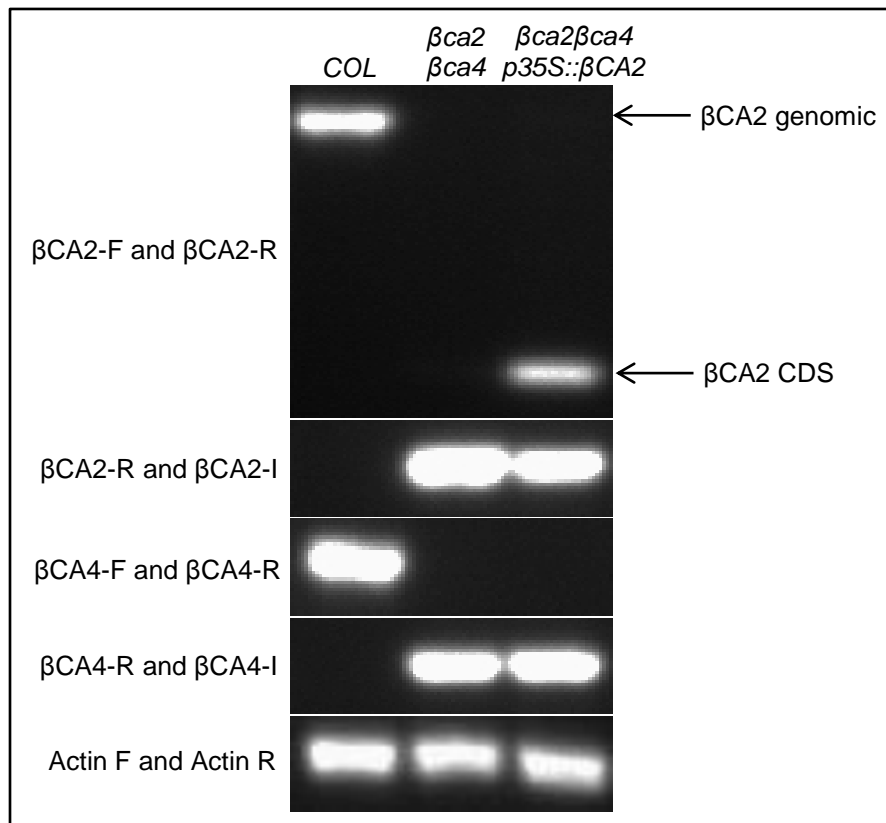

**Supplemental Fig. 2. Genomic PCR probing for the *p35S::βCA2* construct in the *βca2βca4* mutant.** A *βca2βca4* mutant transformed with the *p35S::βCA2* construct displays a band for the *βCA2* CDS whereas the wildtype (COL) and double-mutant samples do not display this band. The complemented line still does not display the genomic *βCA2* nor *βCA4* bands but still shows the PCR products for the T-DNA inserts in the *βCA2* and *βCA4* genes. Actin was used as a loading control.
