# Supplementary material
Source: PubMed Central journal article supplement (PMC4854698)
Supplement: supp_pp.15.01990_PP2015-01990R1_Supplemental_Materialfig3.pdf [file supp_pp.15.01990_PP2015-01990R1_Supplemental_Materialfig3.pdf]

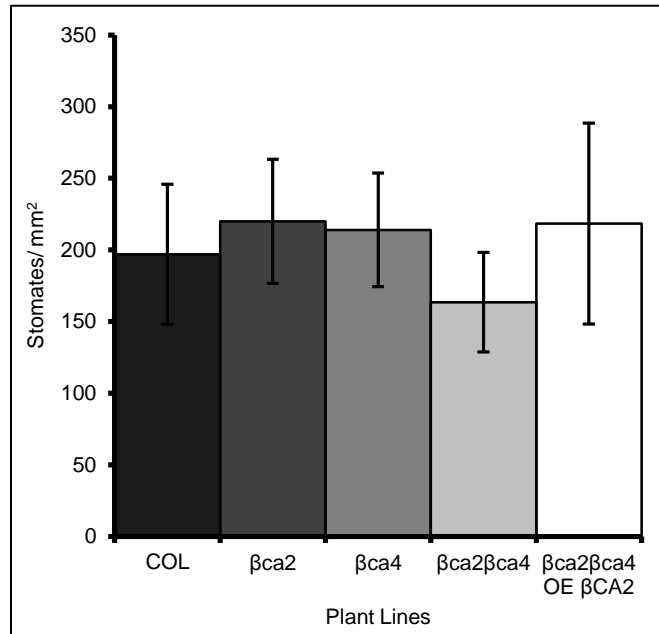

**Supplemental Fig. 3. Lacking cytosolic CAs does not alter the stomatal density of the double mutant.** Leaves of 10 week old Arabidopsis plants grown in 200  $\mu\text{L L}^{-1}$   $\text{CO}_2$  were submerged in a 1  $\text{mg mL}^{-1}$  propidium iodide solution (Engineer et al., 2014) for five minutes before being imaged by confocal microscopy. The Kr/Ar laser was set to 488 nm to excite propidium iodide and its fluorescence was detected between 620-640 nm. Confocal images were analyzed using ImageJ (NIH) to obtain stomata counts. Each bar represents the mean  $\pm$  SD of five individual plants for each line.
