# Supplementary material
Source: PubMed Central journal article supplement (PMC4854698)
Supplement: supp_pp.15.01990_PP2015-01990R1_Supplemental_Materialtbl1.pdf [file supp_pp.15.01990_PP2015-01990R1_Supplemental_Materialtbl1.pdf]

1 **Supplemental Table I. The total amino acid amounts obtained from the amino acid**  
2 **analysis performed on the wildtype, single-mutants, and double-mutant leaves.** Samples  
3 were sent to TAMU Protein Chemistry Laboratory at Texas A&M for amino acid analysis. Each  
4 value represents the mean  $\pm$  SD of three independent plants.

| Amino Acids | Amino Acid Composition ( $\mu\text{g g}^{-1}$ Leaf Tissue) |                   |                   |                                  |
|-------------|------------------------------------------------------------|-------------------|-------------------|----------------------------------|
|             | COL                                                        | $\beta\text{ca}2$ | $\beta\text{ca}4$ | $\beta\text{ca}2\beta\text{ca}4$ |
| ASP         | 185.3 $\pm$ 12.6                                           | 173.0 $\pm$ 17.6  | 179.6 $\pm$ 23.5  | 87.0 $\pm$ 28.4                  |
| GLU         | 339.1 $\pm$ 13.0                                           | 349.3 $\pm$ 16.1  | 342.4 $\pm$ 37.6  | 245.8 $\pm$ 94.7                 |
| ASN         | 23.5 $\pm$ 2.2                                             | 20.0 $\pm$ 2.8    | 20.2 $\pm$ 2.3    | 22.1 $\pm$ 6.6                   |
| SER         | 83.6 $\pm$ 9.6                                             | 86.0 $\pm$ 13.7   | 119.6 $\pm$ 31.4  | 407.7 $\pm$ 256.2                |
| GLN         | 246.5 $\pm$ 19.5                                           | 316.4 $\pm$ 47.2  | 256.9 $\pm$ 14.9  | 113.8 $\pm$ 41.0                 |
| HIS         | 0.0 $\pm$ 0.0                                              | 0.0 $\pm$ 0.0     | 0.0 $\pm$ 0.0     | 0.0 $\pm$ 0.0                    |
| GLY         | 76.5 $\pm$ 18.3                                            | 44.8 $\pm$ 11.6   | 35.6 $\pm$ 11.3   | 177.0 $\pm$ 87.5                 |
| THR         | 59.0 $\pm$ 11.4                                            | 56.3 $\pm$ 12.1   | 76.0 $\pm$ 16.7   | 23.0 $\pm$ 6.7                   |
| ALA         | 45.5 $\pm$ 7.2                                             | 23.4 $\pm$ 4.0    | 36.5 $\pm$ 5.8    | 25.1 $\pm$ 8.6                   |
| ARG         | 9.3 $\pm$ 5.0                                              | 12.2 $\pm$ 7.4    | 16.1 $\pm$ 9.1    | 6.9 $\pm$ 3.7                    |
| TYR         | 1.2 $\pm$ 0.2                                              | 0.7 $\pm$ 0.1     | 1.4 $\pm$ 0.2     | 0.6 $\pm$ 0.2                    |
| VAL         | 8.2 $\pm$ 1.5                                              | 6.6 $\pm$ 0.2     | 8.2 $\pm$ 0.6     | 4.2 $\pm$ 1.3                    |
| MET         | 0.0 $\pm$ 0.0                                              | 0.0 $\pm$ 0.0     | 0.0 $\pm$ 0.0     | 0.0 $\pm$ 0.0                    |
| TRP         | 6.8 $\pm$ 8.7                                              | 0.7 $\pm$ 0.6     | 0.7 $\pm$ 1.1     | 0.7 $\pm$ 0.7                    |
| PHE         | 9.7 $\pm$ 2.3                                              | 5.4 $\pm$ 0.7     | 6.2 $\pm$ 1.6     | 6.2 $\pm$ 2.1                    |
| ILE         | 4.3 $\pm$ 2.9                                              | 1.9 $\pm$ 1.0     | 2.5 $\pm$ 1.2     | 1.2 $\pm$ 0.4                    |
| LEU         | 1.9 $\pm$ 0.5                                              | 2.2 $\pm$ 0.3     | 3.5 $\pm$ 0.3     | 1.7 $\pm$ 0.6                    |
| LYS         | 1.9 $\pm$ 0.3                                              | 2.1 $\pm$ 0.7     | 3.2 $\pm$ 0.6     | 1.5 $\pm$ 0.5                    |
| PRO         | 24.5 $\pm$ 5.0                                             | 33.3 $\pm$ 11.7   | 25.5 $\pm$ 1.8    | 9.8 $\pm$ 17.0                   |

5  
6  
7  
8  
9
