# Supplementary material
Source: PubMed Central journal article supplement (PMC4854698)
Supplement: supp_pp.15.01990_PP2015-01990R1_Supplemental_Materialtbl2.pdf [file supp_pp.15.01990_PP2015-01990R1_Supplemental_Materialtbl2.pdf]

- 1 **Supplemental Table II. A list of all primer sets used to genotype plant lines and generate**  
 2 **constructs for GUS analysis, GFP fluorescence, and complementation studies.**

| <b>Primer Name</b> | <b>Primer Sequence</b>                                    |
|--------------------|-----------------------------------------------------------|
| β2-F               | 5' -TGT GCC CAT CAC ACG TAC TAG ACT - 3'                  |
| β2-R               | 5' - GTC AAG AGG AAA TGA CAT AAG CCC C - 3'               |
| β2-I               | 5' - CCA AAC TGG AAC AAC ACT CAA CCC - 3'                 |
| β4-F               | 5' - GCG AAG ATC AAA GCG TTG ACG - 3'                     |
| β4-R               | 5' - CGC CAA CTC CAG AGT GTC T - 3'                       |
| β4-I               | 5' - AAC GTC CGC AAT GTG TTA TTA AGT TGT C - 3'           |
| β2-GFP-F           | 5' - CAC CAT GGG AAA CGA ATC ATA T - 3'                   |
| β2-GFP-R           | 5' - TAT AGA ATG AAC GGG GGA - 3'                         |
| β2-OE-R            | 5' - TCA TAT AGA ATG AAC GGG GGA - 3'                     |
| β4.1-GFP-F         | 5' - CAC CAT GGC TCC TGC ATT CGG AAA A - 3'               |
| β4.2-GFP-F         | 5' - CAC CAT GGC AAC GGA ATC GTA CG - 3'                  |
| β4-GFP-R           | 5' - AGA GAA GGC AAA AGC AGG AGT GGT C - 3'               |
| pβ2-GUS-F          | 5' - CAC CGA AAT GGC TCA TCA GAC TCA GAG A - 3'           |
| pβ2-GUS-R          | 5' - TTC TCA GTT CTG TGC AAG TCA TTG - 3'                 |
| pβ4.1-GUS-F        | 5' - CAC CGA ATC AGA ACG GAA CTG ATA AAG ATG ATG A - 3'   |
| pβ4.1-GUS-R        | 5' - TAT AAA TGA TCT CTT CCT TTG CTT CTC CTA CCA ACC - 3' |
| pβ4.2-GUS-F        | 5' - CAC CGT CGT CAT AAT TCC TTG AAA C - 3'               |
| pβ4.2-GUS-R        | 5' - TTC GTC TTT TTC CTA ATG AAT ACA AAC - 3'             |
| Actin F            | 5' - CAT CTA TGA TTG GTA TGG AGA ATG CTG G - 3'           |
| Actin R            | 5' - CCT TTG CGA TCC ACA TCT GCT - 3'                     |

3

4
